# Supplementary material for: m6A mRNA modification maintains colonic epithelial cell homeostasis via NF-κB–mediated antiapoptotic pathway
Source: PubMed Central journal article supplement — Sci Adv. 2022 Mar 25;8(12):eabl5723. doi: 10.1126/sciadv.abl5723 (PMC8956260; doi:10.1126/sciadv.abl5723), 2022-03-25
Supplement: sciadv.abl5723_sm.pdf [file sciadv.abl5723_sm.pdf]

Supplementary Materials for  
**m<sup>6</sup>A mRNA modification maintains colonic epithelial cell homeostasis via  
NF-κB-mediated antiapoptotic pathway**

Ting Zhang, Chenbo Ding\*, Huifang Chen, Jun Zhao, Zhejun Chen, Baiwen Chen,  
Kaiqiong Mao, Yajuan Hao, Manolis Roulis, Hao Xu, Yuval Kluger, Qiang Zou, Youqiong Ye,  
Meixiao Zhan\*, Richard A. Flavell\*, Hua-Bing Li\*

\*Corresponding author. Email: chenbo.ding@sjtu.edu.cn (C.D.); zhanmeixiao1987@126.com (M.Z.);  
richard.flavell@yale.edu (R.A.F.); huabing.li@shsmu.edu.cn (H.-B.L.)

Published 25 March 2022, *Sci. Adv.* **8**, eabl5723 (2022)  
DOI: 10.1126/sciadv.abl5723

**This PDF file includes:**

Figs. S1 to S6  
Table S1

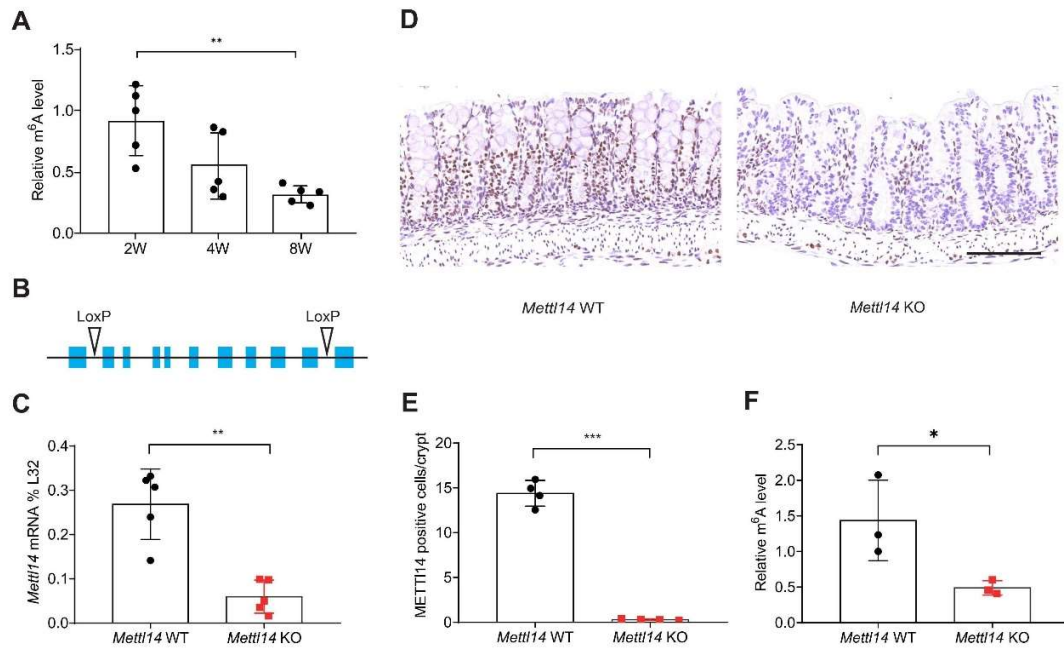

**Fig. S1. Generation and verification of *Mettl14* KO mice in intestinal epithelial cells**

**A**, m<sup>6</sup>A dot plot quantitative analysis of colonic epithelial cells from mice of two weeks, four weeks and eight weeks ( $n = 5$  mice per group). **B**, Two loxP sites were inserted into the first and last introns of *Mettl14* by CRISPR technology. **C-F**, Verification of METTL14 depletion in colonic epithelial cells by qRT-PCR (**C**,  $n = 5$  mice per group), representative immunohistochemistry staining (**D**, Scale bars = 100 μm) and quantitative analysis (**E**,  $n = 4$  mice per group), overall m<sup>6</sup>A mRNA level (**F**,  $n = 3$  mice per group). Data are presented as mean ± s.d. One-way ANOVA analysis (**A**) and two-sided Student's *t*-test (**C**, **E**, and **F**) were performed (\*,  $P < 0.05$ ; \*\*,  $P < 0.01$ ; \*\*\*,  $P < 0.001$ ).

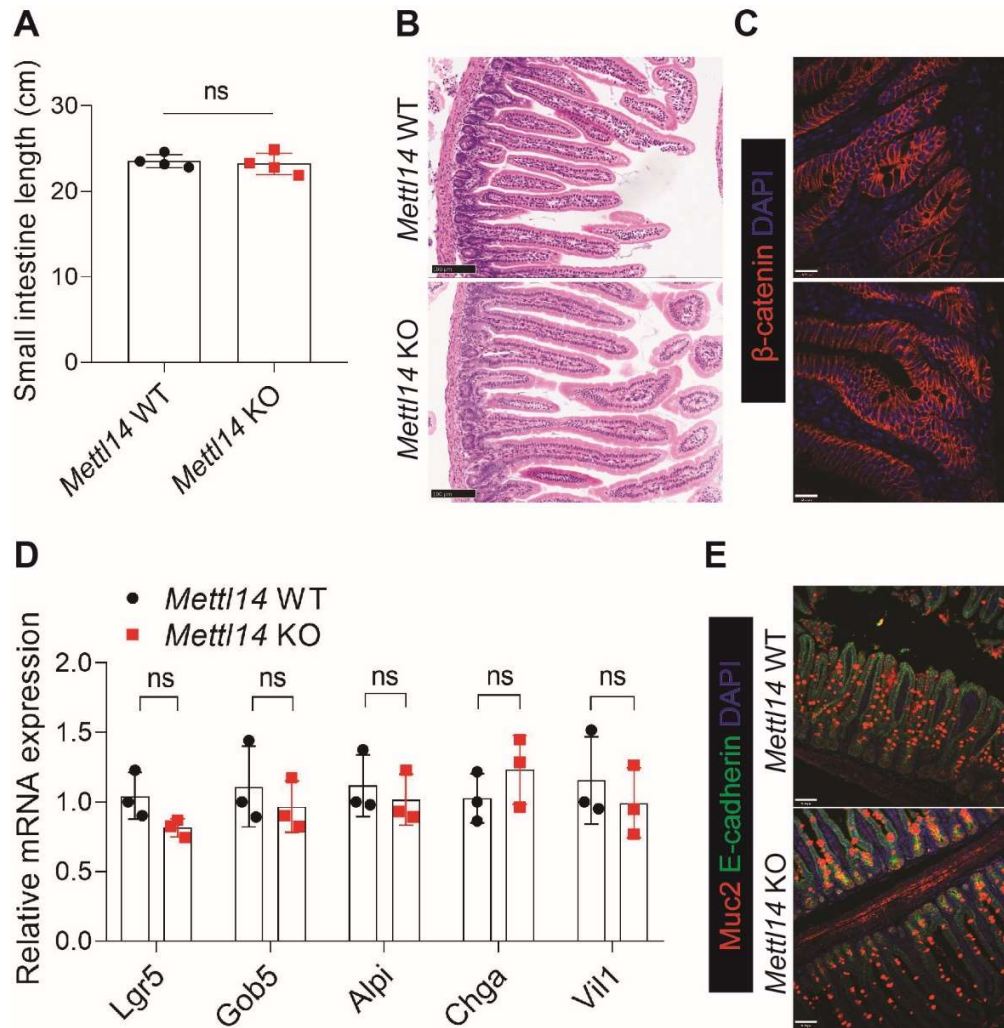

**Fig. S2. *Mettl14* KO in intestinal tract does not impair the normal development and crypt integrity of small intestine.**

**A**, quantitative analysis of the length of small intestine from *Mettl14* WT and *Mettl14* KO mice of two weeks ( $n = 4$  per group). **B**, Representative H&E staining of small intestine sections from *Mettl14* WT and *Mettl14* KO mice at 2-week old (Scale bars = 100  $\mu$ m). **C**, Representative  $\beta$ -catenin staining of small intestine sections from *Mettl14* WT and *Mettl14* KO mice at 2-week old (Scale bars = 18  $\mu$ m). **D**, qRT-PCR analysis of different IECs specific marker genes in small intestine from *Mettl14* WT and *Mettl14* KO mice of two weeks ( $n = 3$  per group). **E**, Representative Muc2 staining of small intestine sections from *Mettl14* WT and *Mettl14* KO mice at 2-week old (Scale bars = 70  $\mu$ m). ns, no significance.

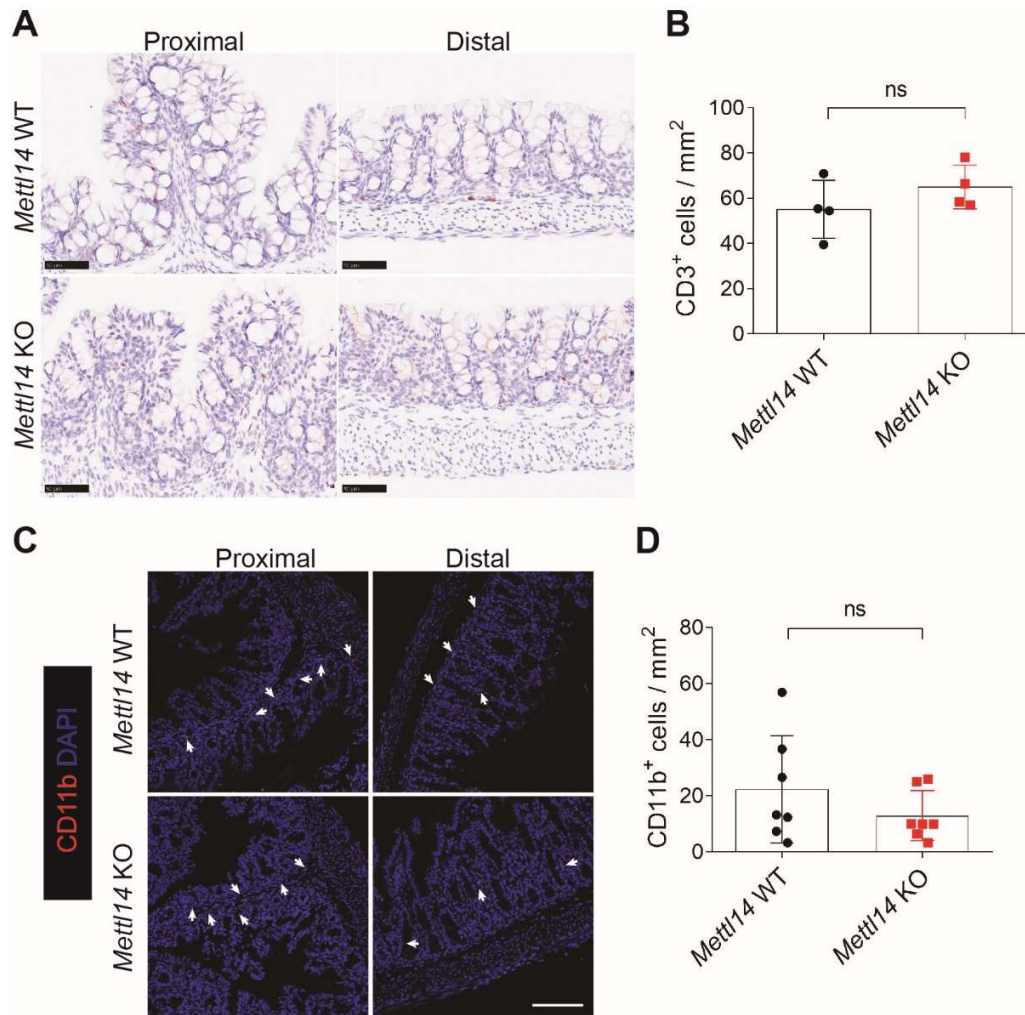

**Fig. S3. Inflammatory cells infiltrated in colon showed no difference between *Mettl14* WT and *Mettl14* KO mice**

**A** and **B**, CD3 stained proximal and distal colon sections of *Mettl14* WT and *Mettl14* KO mice of two weeks (**A**, Scale bar = 50  $\mu$ m) and quantitative analysis (**B**,  $n = 4$  per group). **C** and **D**, CD11b stained proximal and distal colon sections of *Mettl14* WT and *Mettl14* KO mice of two weeks (**C**, Scale bar = 100  $\mu$ m) and quantitative analysis (**D**,  $n = 7$  per group), CD11b positive cell (arrow). Data are presented as mean  $\pm$  s.d. Two-sided Student's *t*-test (**B** and **D**) was performed. ns, no significance.

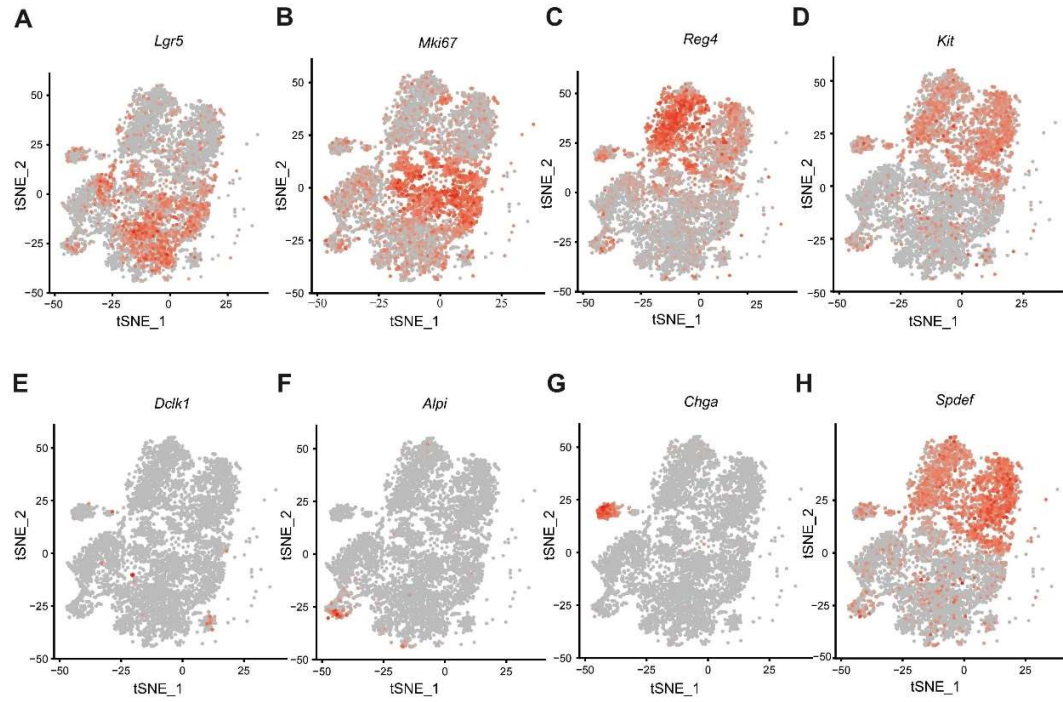

**Fig. S4. Expression levels of signature genes in each cell cluster**

**A-H**, t-SNE plot of expression levels of signature genes in different clusters. Stem cell marker gene, *Lgr5* (**A**), TA cell marker gene, *Mki67* (**B**), DCS cell marker gene, *Reg4* (**C**), DCS cell marker gene, *Kit* (**D**), Tuft cell marker gene, *Dclk1* (**E**), Colonocyte marker gene, *Alpi* (**F**), Enteroendocrine cell marker gene, *Chga* (**G**), Goblet cell marker gene, *Spdef* (**H**).

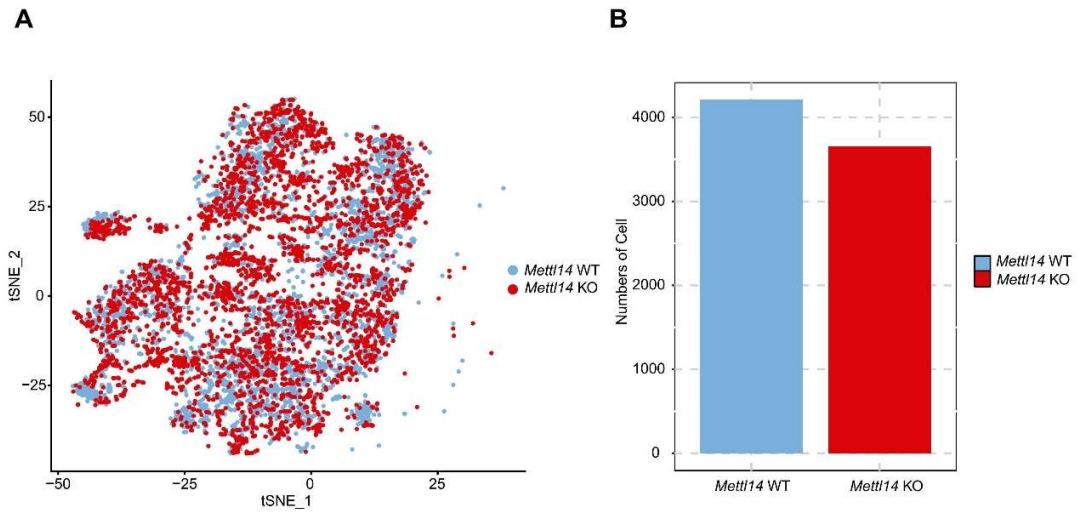

**Fig. S5. Separated *t*-SNE plot of colonic epithelial cells from *Mettl14* WT and *Mettl14* KO mice**

**A** and **B**, 7863 epithelial cells from *Mettl14* WT and *Mettl14* KO mouse colon of two weeks were separated and *t*-SNE plot was defined.

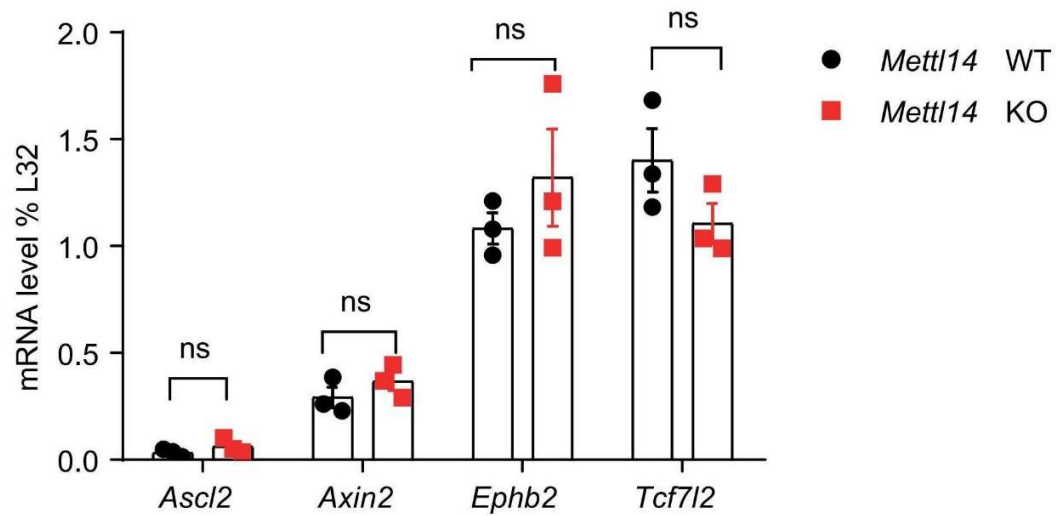

**Fig. S6. Wnt signaling is not changed between *Mettl14* WT and *Mettl14* KO mice**  
qRT-PCR analysis of Wnt downstream target genes in *Mettl14* WT and *Mettl14* KO mice of two weeks ( $n = 3$  per group). ns, no significance.

**Table S1. Antibodies used in immunohistochemical and immunofluorescence analysis**

| Antibodies             | Supplier                     | Conjugated      | Catalog number |
|------------------------|------------------------------|-----------------|----------------|
| $\beta$ -catenin       | Biologend                    | Unconjugated    | 844602         |
| CD3                    | Abcam                        | Unconjugated    | ab237721       |
| CD11b                  | Abcam                        | Unconjugated    | ab133357       |
| Cleaved caspase-3      | Cell Signaling Technology    | Unconjugated    | 9579           |
| E-cadherin             | BD Transduction Laboratories | FITC            | 612130         |
| Mettl14                | Sigma                        | Unconjugated    | HPA038002      |
| Muc2                   | Novus Biologicals            | Unconjugated    | NBP1-31231     |
| Ki67                   | Abcam                        | Unconjugated    | ab16667        |
| Donkey anti-rabbit IgG | Biologend                    | Alexa Fluor 647 | 406414         |
| Donkey anti-rabbit IgG | Biologend                    | Alexa Fluor 594 | 406418         |
| Goat anti-mouse IgG    | Biologend                    | Alexa Fluor 594 | 405326         |
